# Supplementary material for: RON12, a novel Plasmodium-specific rhoptry neck protein important for parasite proliferation
Source: PubMed Central journal article supplement (PMC3922828; doi:10.1111/cmi.12181), 2013-08-28

Figure S1

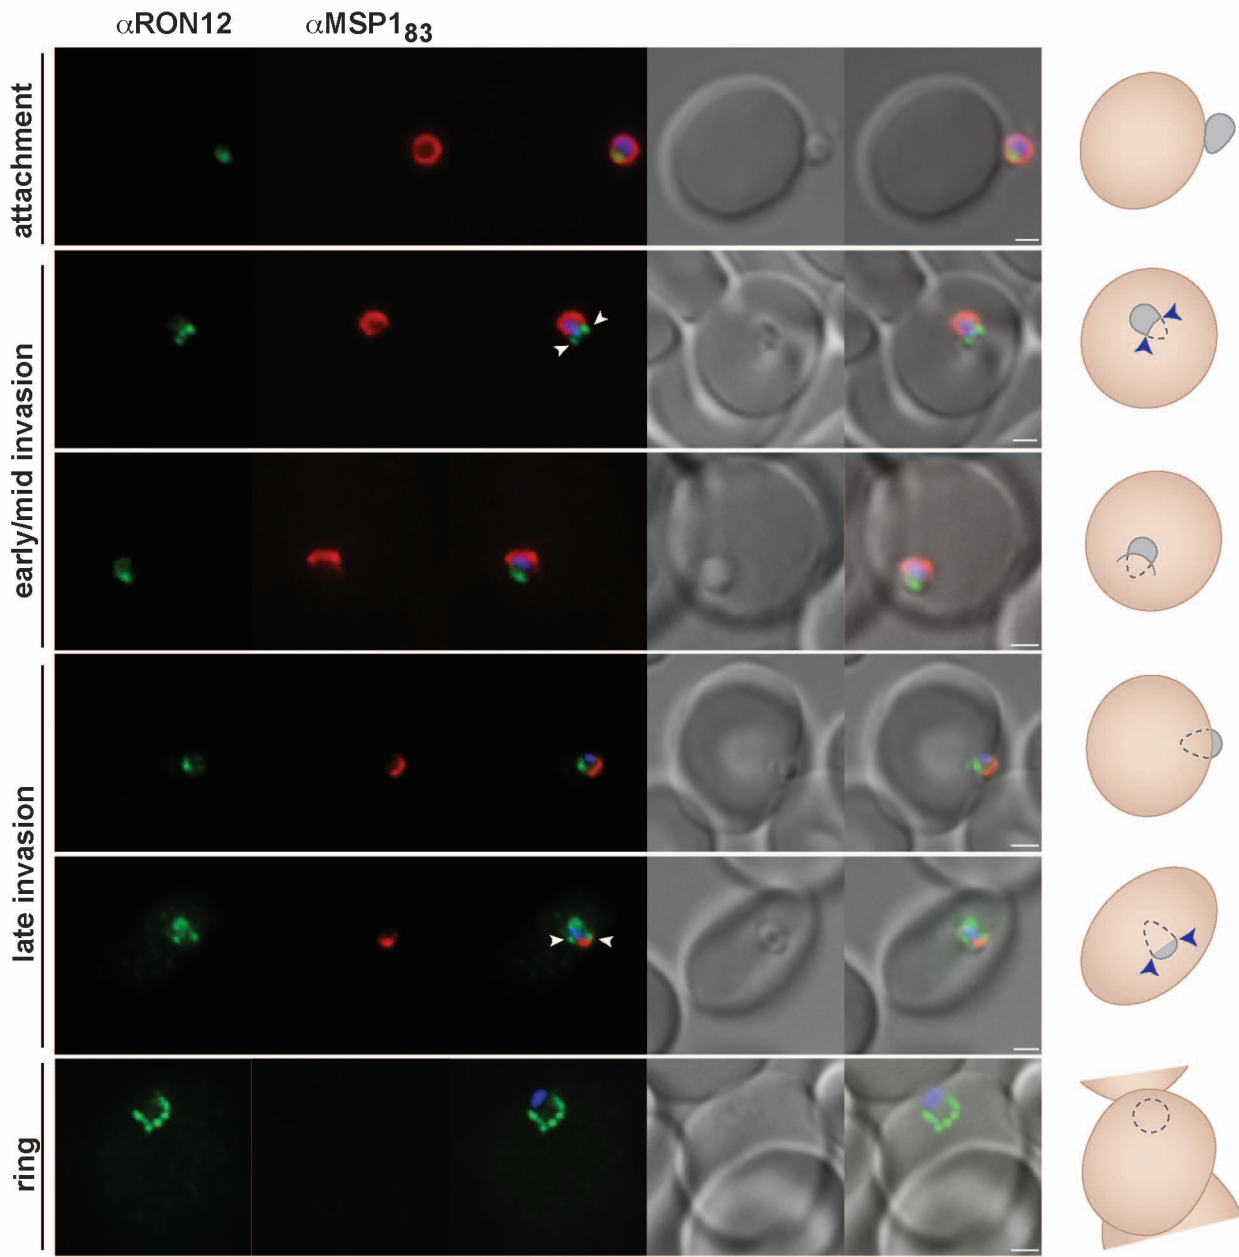

**Figure S2****A**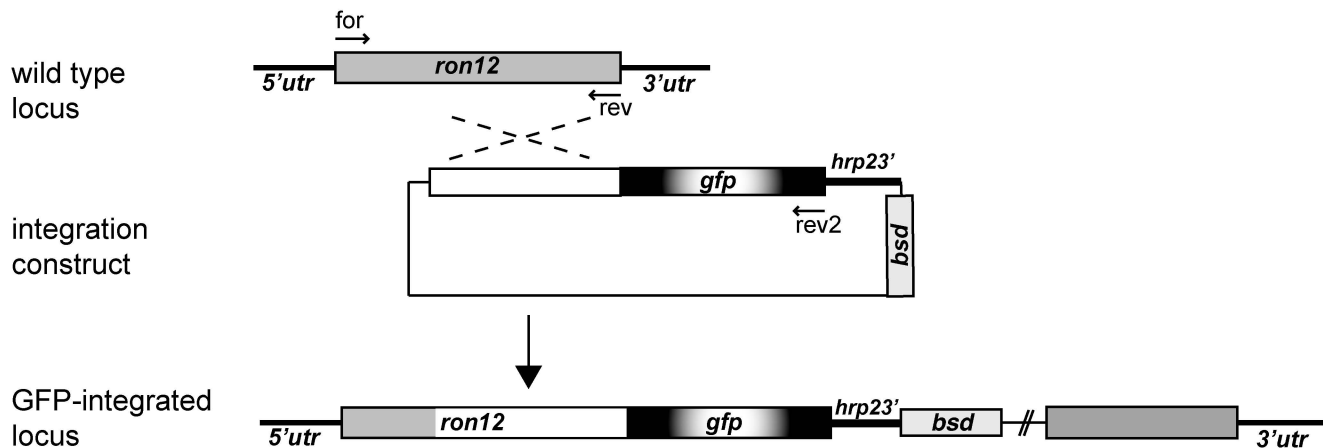**B**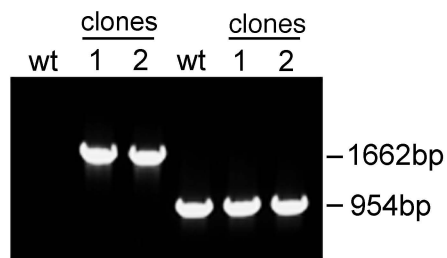**C**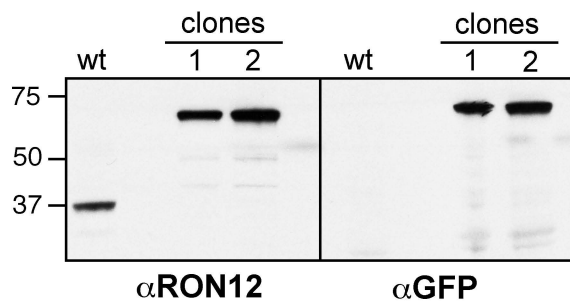**D**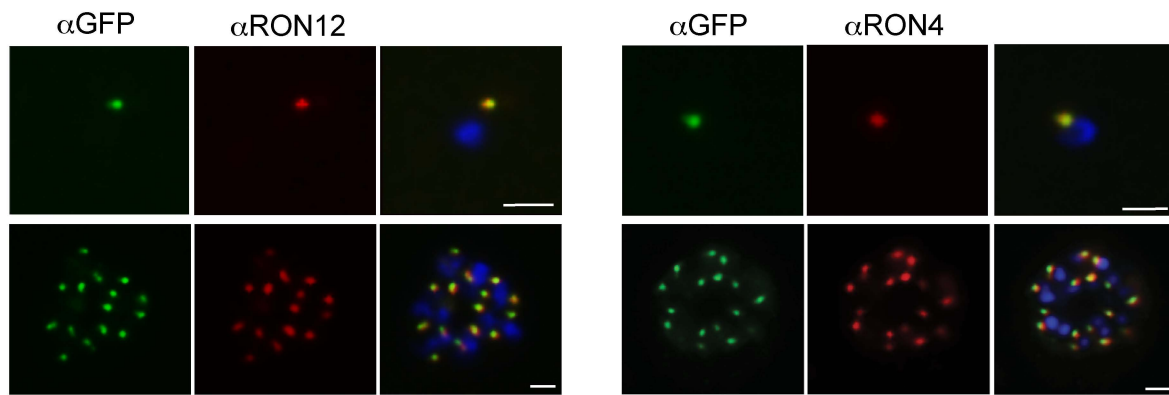

Figure S3

A

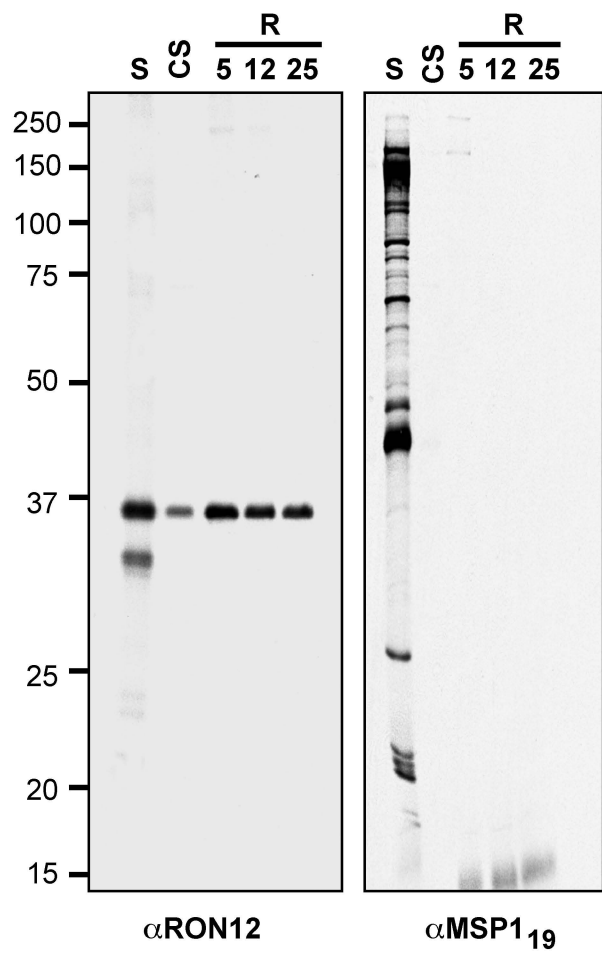

B

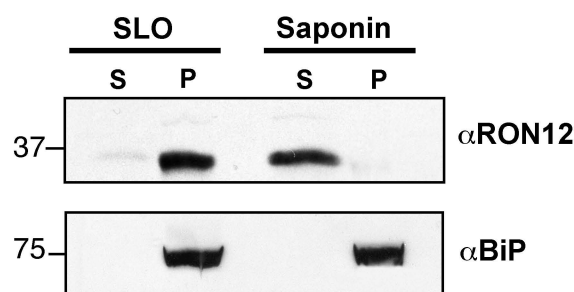

**Figure S4****A**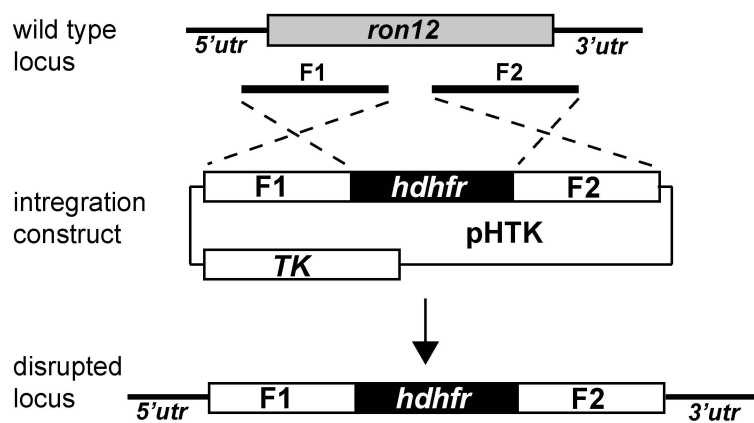**B**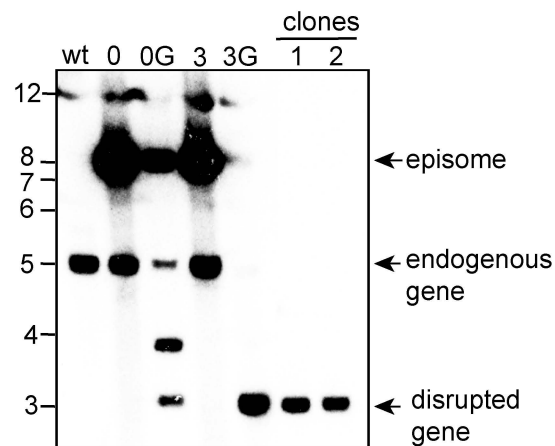**C**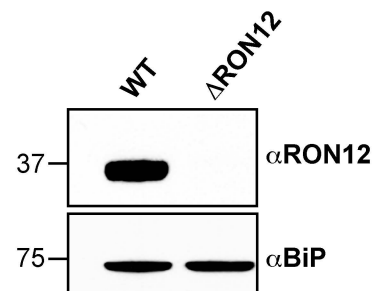**D**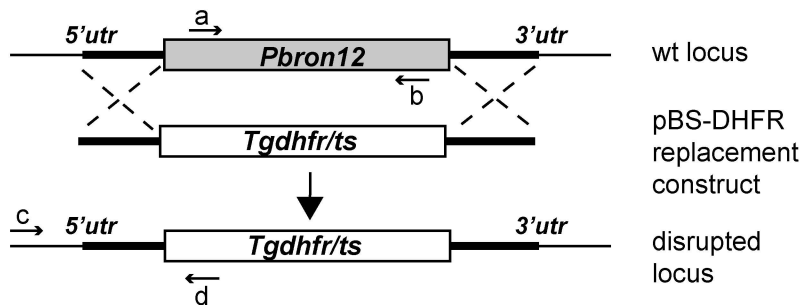**E**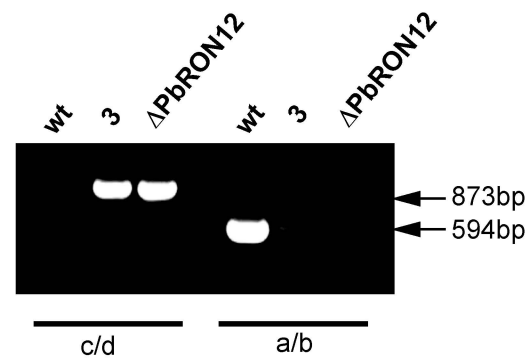**F**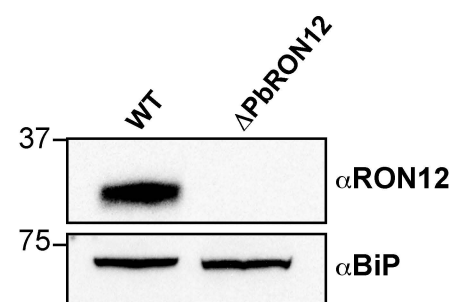

Figure S5

A

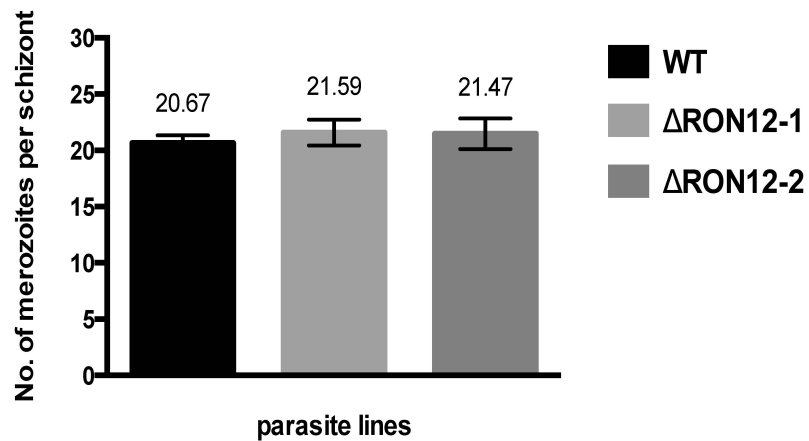

B

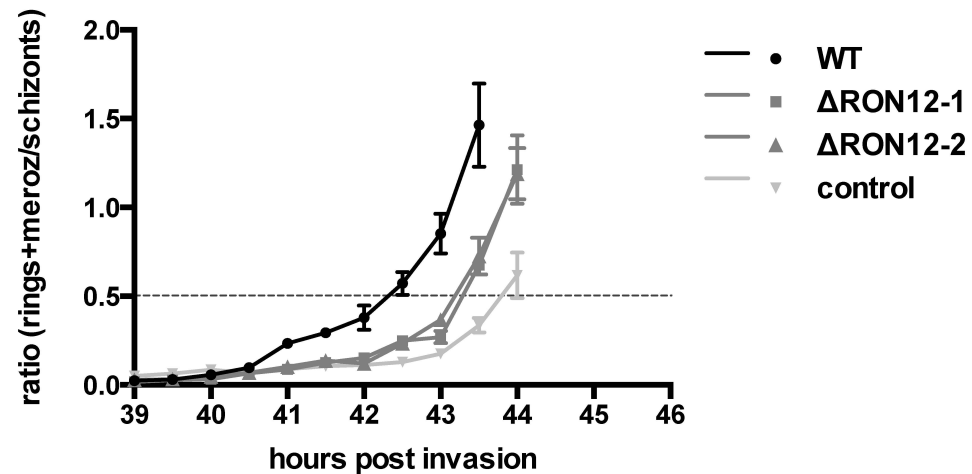

Figure S6

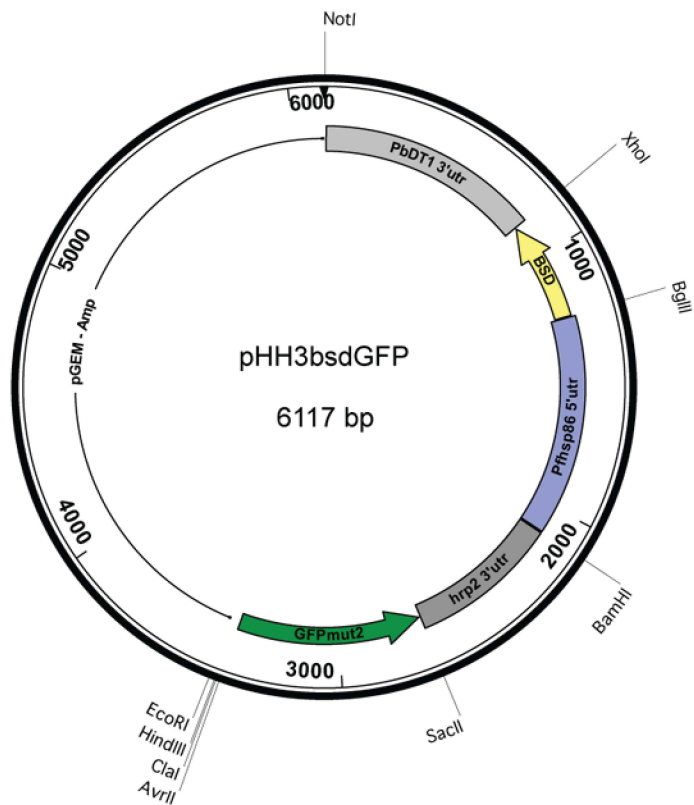

Supplement: NIHMS517252-supplement-Supplemental_Figs.pdf [file NIHMS517252-supplement-Supplemental_Figs.pdf]
